# Supplementary material for: Formation of calcium phosphate nanostructures under the influence of self-assembling hybrid elastin-like-statherin recombinamers
Source: Royal Society of Chemistry journal article supplement (doi:10.1039/c6ra01100d), 2016-01-01
Supplement: c6ra01100d1.pdf [file c6ra01100d1.pdf]

## Supplementary information

### Formation of calcium phosphate nanostructures under the influence of self-assembling hybrid elastin-like-statherin recombinamers

M. Hamed Misbah,<sup>a</sup> M. Espanol,<sup>b</sup> Luis Quintanilla,<sup>a</sup> M. P. Ginebra<sup>b</sup> and J. Carlos Rodríguez-Cabello<sup>\*a</sup>

1. G.I.R. Bioforge, University of Valladolid, CIBER-BBN, Paseo de Belén 19, 47011 Valladolid, Spain.
2. Biomaterials, Biomechanics and Tissue Engineering Group, Department of Materials Science and Metallurgy, Technical University of Catalonia, Diagonal 647, 08028 Barcelona, Spain.

#### 1. SDS-page analysis

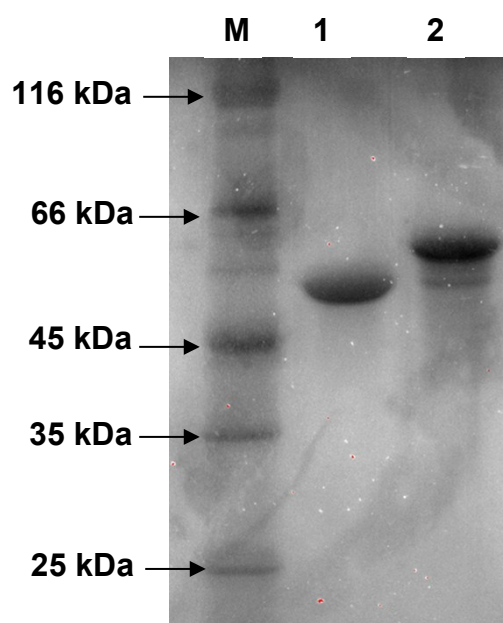

**Figure S1.** Electrophoresis analysis of the ELRs E50I60 (line 1) and (SNA15)<sub>3</sub>E50I60 (line 2). The numbers on the left side indicate the molecular weight of the marker (M).

**2. Matrix-assisted laser desorption-ionization time-of-flight (MALDI-TOF) mass spectrometry.**

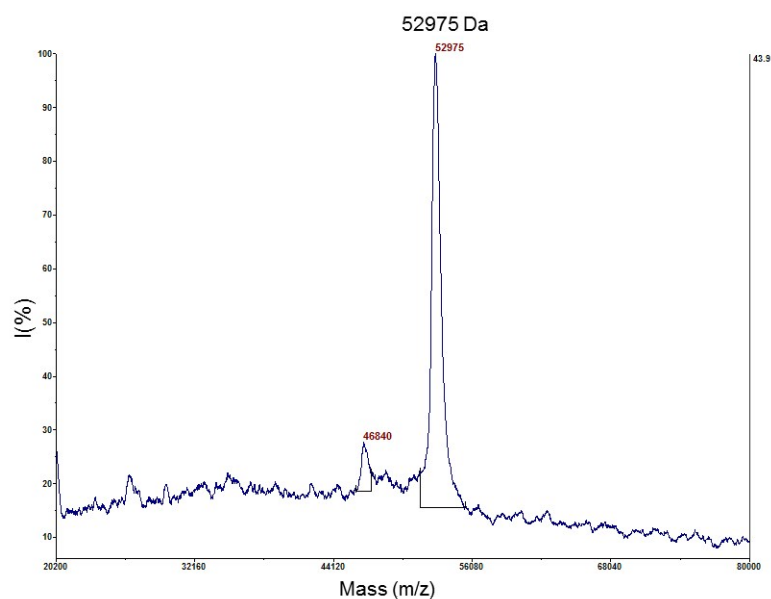

**Figure S2.** MALDI-TOF of the ELR (SN<sub>A</sub>15)<sub>3</sub>E50I60.

**Table S1.** Molecular weight (Mw) of the ELR (SN<sub>A</sub>15)<sub>3</sub>E50I60.

|           | Predicted value (Da) | Experimental value (Da) |
|-----------|----------------------|-------------------------|
| <b>Mw</b> | <b>53018.44</b>      | <b>52970±12</b>         |

**3. Nuclear magnetic resonance (NMR) spectroscopy.**

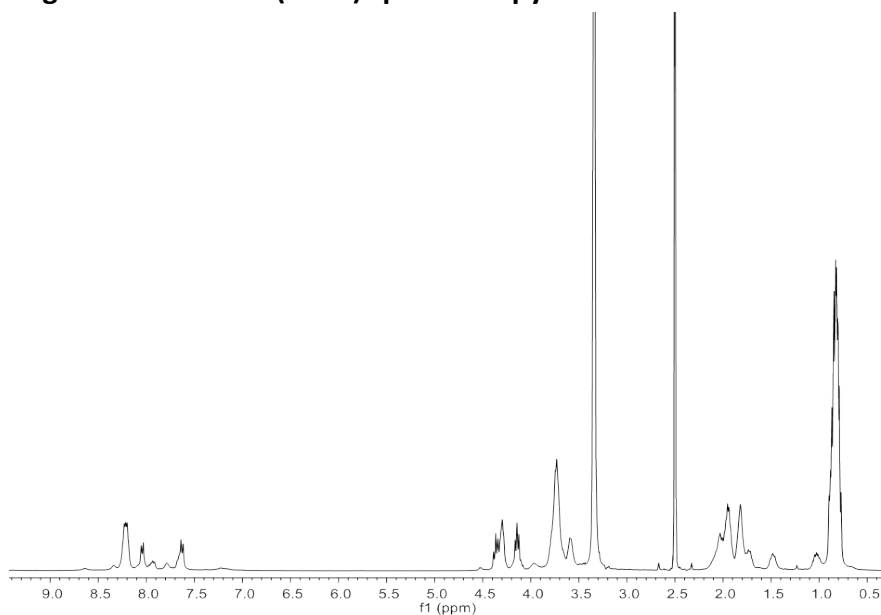

**Figure S3.** <sup>1</sup>H NMR of the ELR (SN<sub>A</sub>15)<sub>3</sub>E50I60.

#### 4. Amino acid Analysis.

**Table S2.** (SN<sub>A</sub>15)<sub>3</sub>E50I60 amino acid analysis.

| Amino acid | Experimental value<br>(count) | Predicted value<br>(count) |
|------------|-------------------------------|----------------------------|
| D          | 8                             | 9                          |
| E          | 17                            | 17                         |
| S          | 1                             | 1                          |
| G          | 241                           | 232                        |
| R          | 9                             | 9                          |
| V          | 147                           | 153                        |
| M          |                               | 1                          |
| F          | 6                             | 6                          |
| I          | 63                            | 63                         |
| L          | 5                             | 5                          |
| K          | 2                             | 3                          |
| P          | 116                           | 111                        |

#### 5. Attenuated total reflection infrared (ATR-IR) spectroscopy.

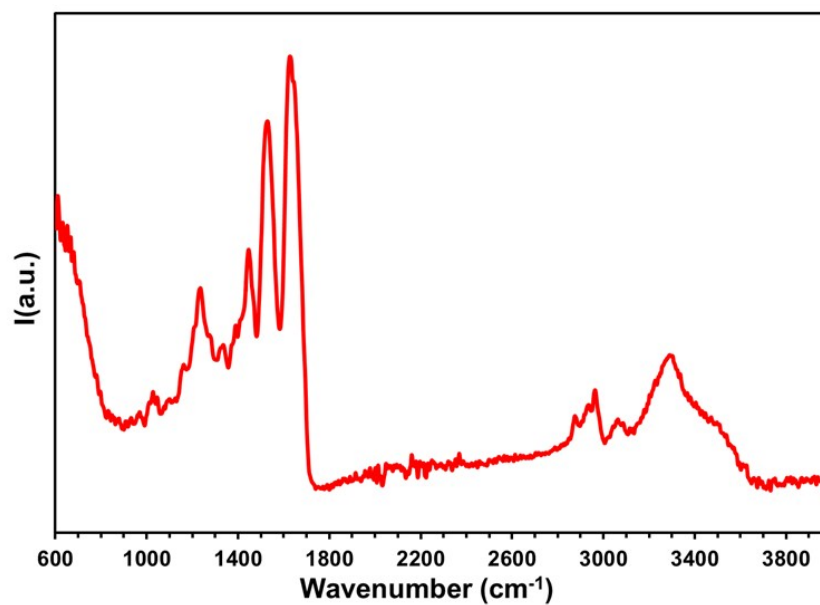

**Figure S4.** FTIR spectrum of the ELR (SN<sub>A</sub>15)<sub>3</sub>E50I60.

## 6. Differential scanning calorimeter (DSC).

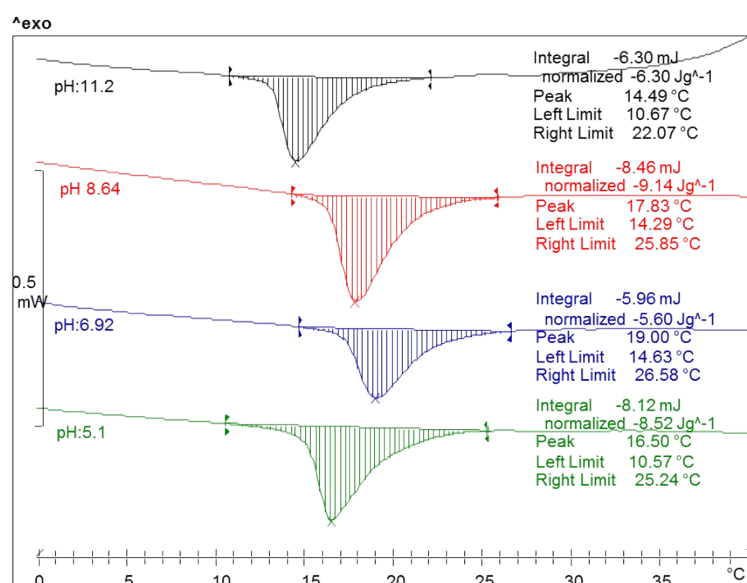

**Figure S5.** DSC of the ELR (SN<sub>A</sub>15)<sub>3</sub>E50I60 at 50mg/mL.

## 7. Energy dispersive X-ray analysis and transmission electron microscopy.

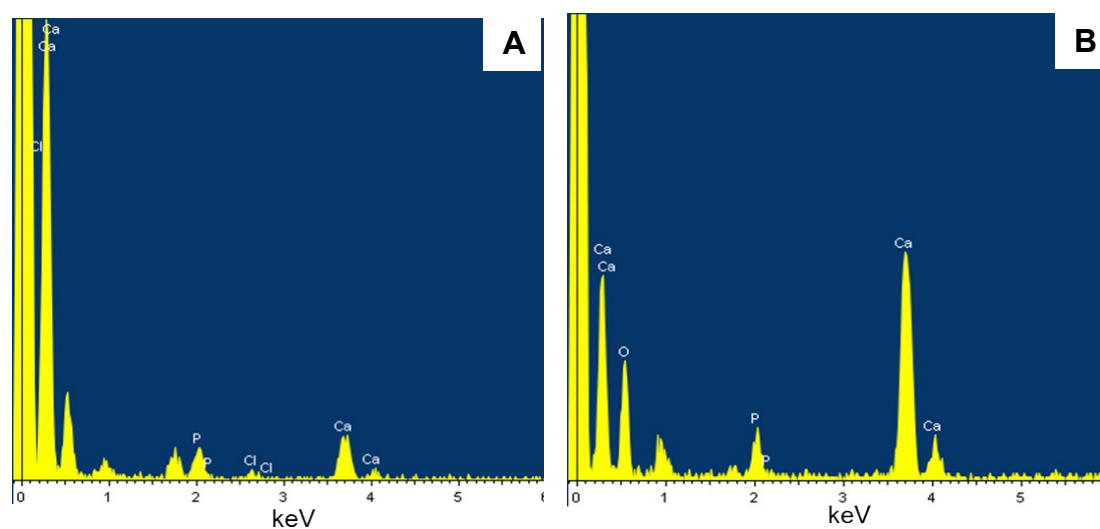

**Figure S6.** EDX spectra of the core of neuron-like morphology in the presence of ((IK)2-SN<sub>A</sub>15-(IK)2)<sub>3</sub>: (A) at 0.5 mg/mL (B) at 2 mg/mL.

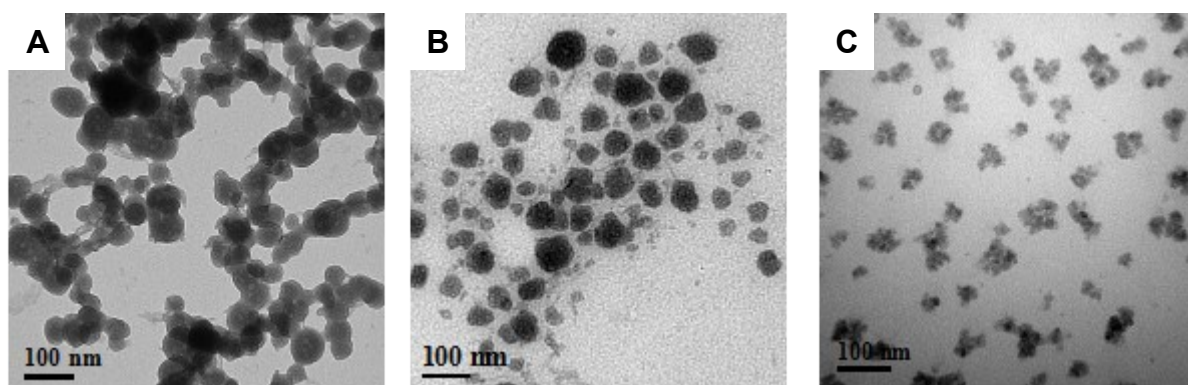

**Figure S7.** TEM of the primary precipitation: (A) in the absence of ELRs, and in the presence of (B) 2 mg/mL  $(\text{SN}_A15)_3\text{E50I60}$  and (C) 2 mg/mL  $((\text{IK})2\text{-SN}_A15(\text{IK})2)_3$ .
